# Supplementary material
Source: ML conference proceedings conference paper supplement (https://openreview.net/forum?id=ABT1XQLbOx)
Supplement: supplementary_material [file attachment]

# Loss (ViT Tiny)

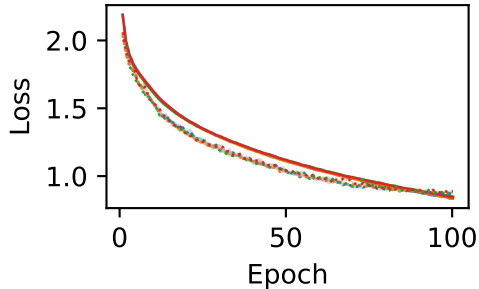

# Accuracy (ViT Tiny)

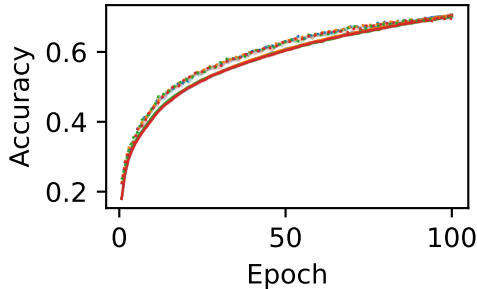

- delta-GClip-0.0001-train
- delta-GClip-0.001-train
- delta-GClip-0.01-train
- delta-GClip-0.00001-train
- ... delta-GClip-0.0001-test
- ... delta-GClip-0.001-test
- ... delta-GClip-0.01-test
- ... delta-GClip-0.00001-test
