# Supplementary material
Source: ML conference proceedings conference paper supplement (https://openreview.net/forum?id=ABT1XQLbOx)

Test Loss (gamma=1.5)

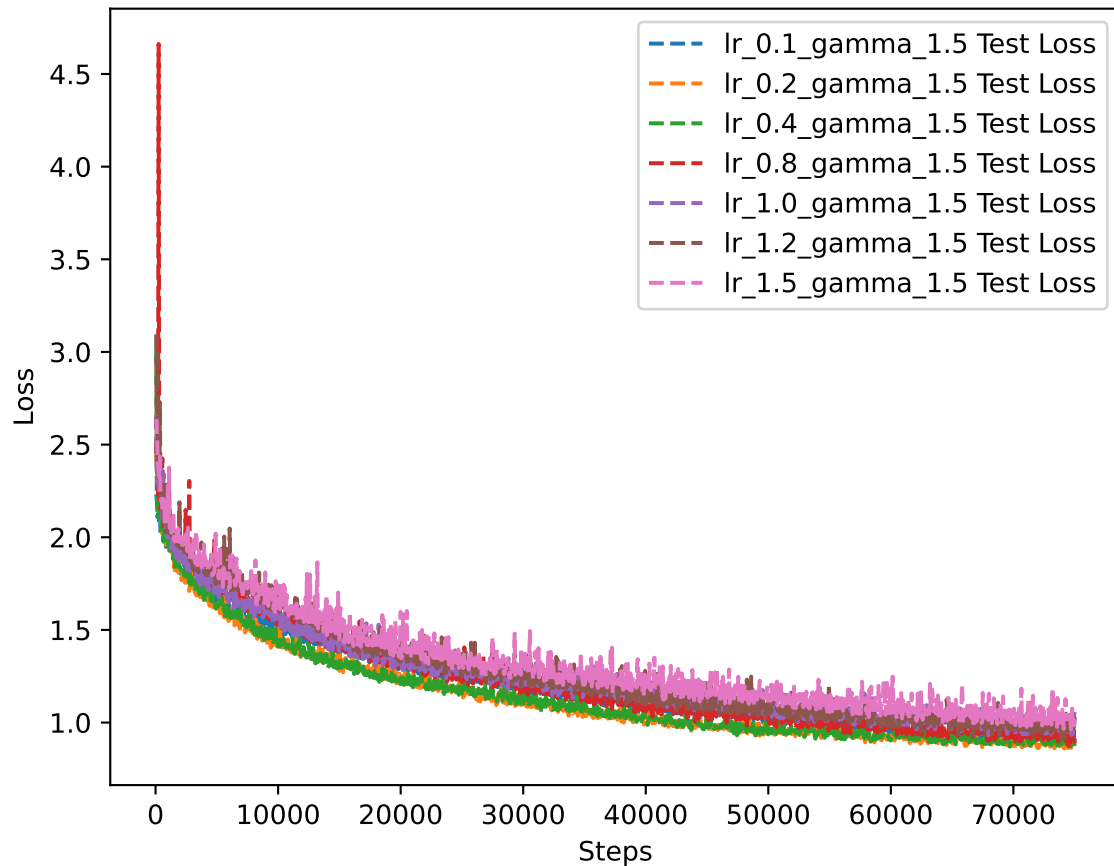

Test Accuracy (gamma=1.5)

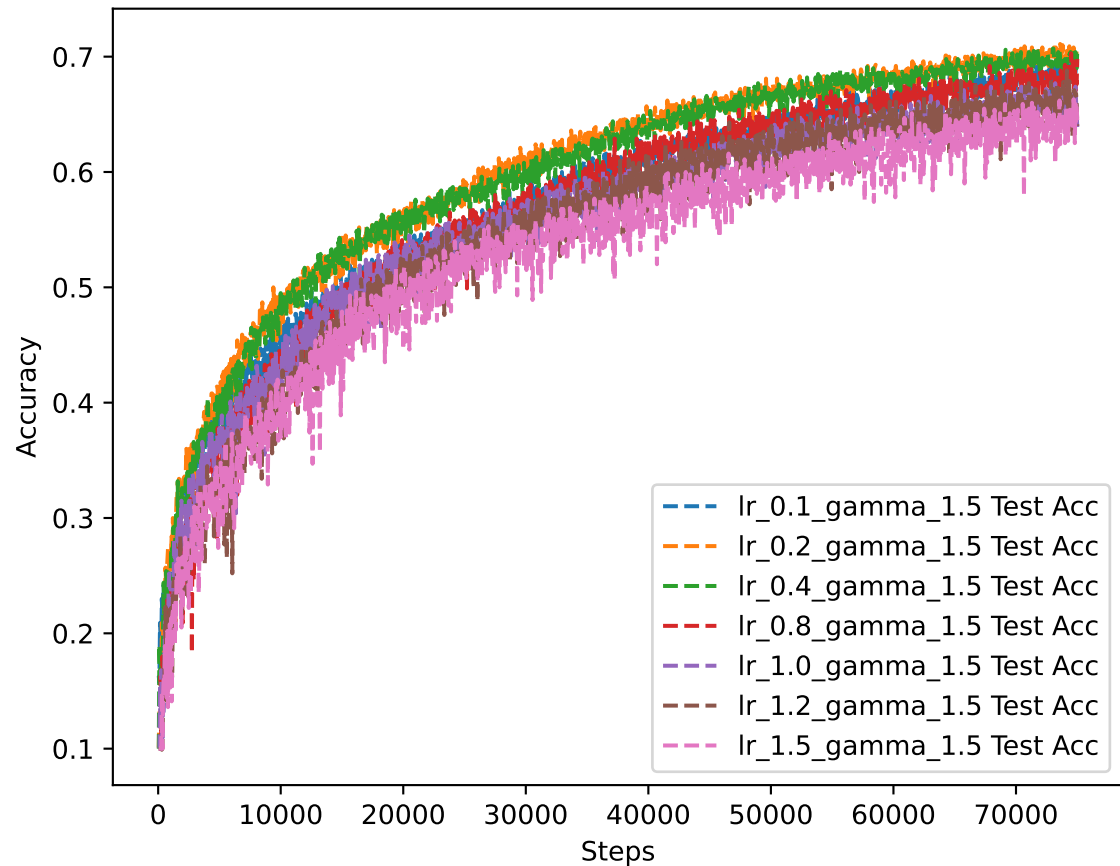

Supplement: supplementary_material [file attachment]

Test Loss

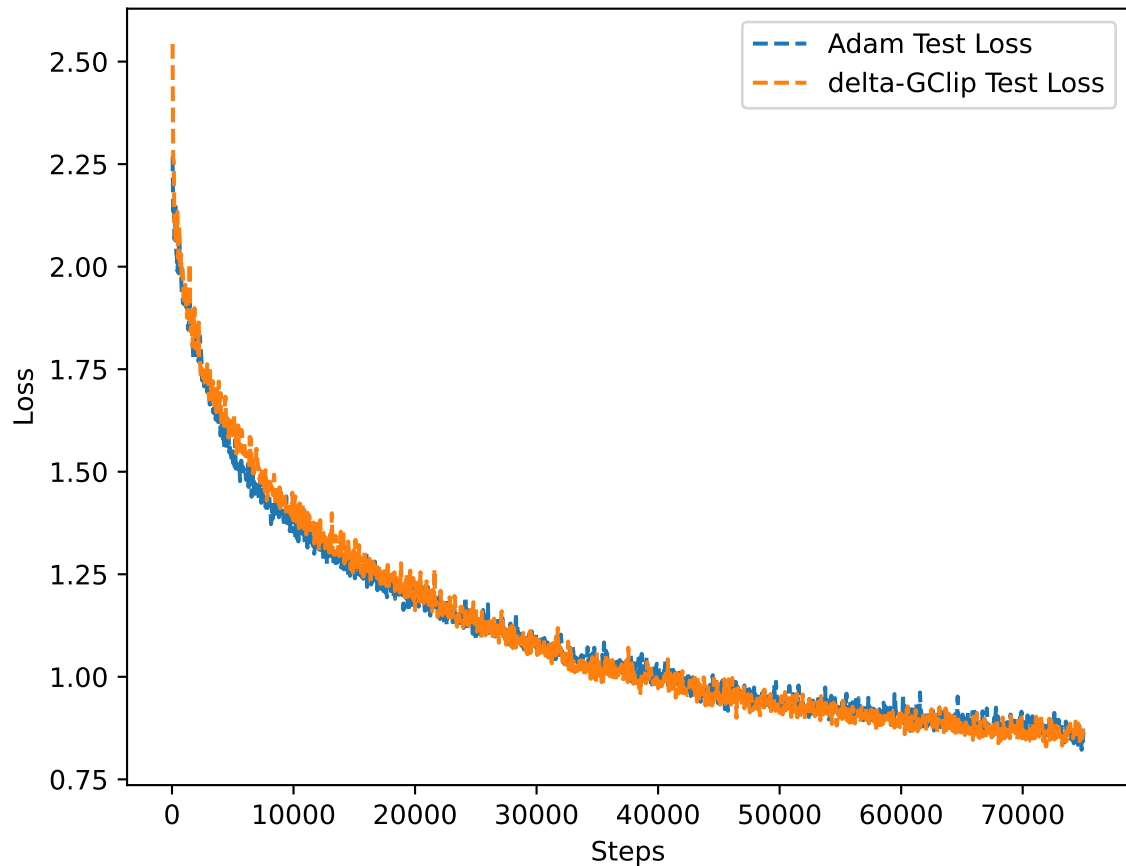

Test Accuracy

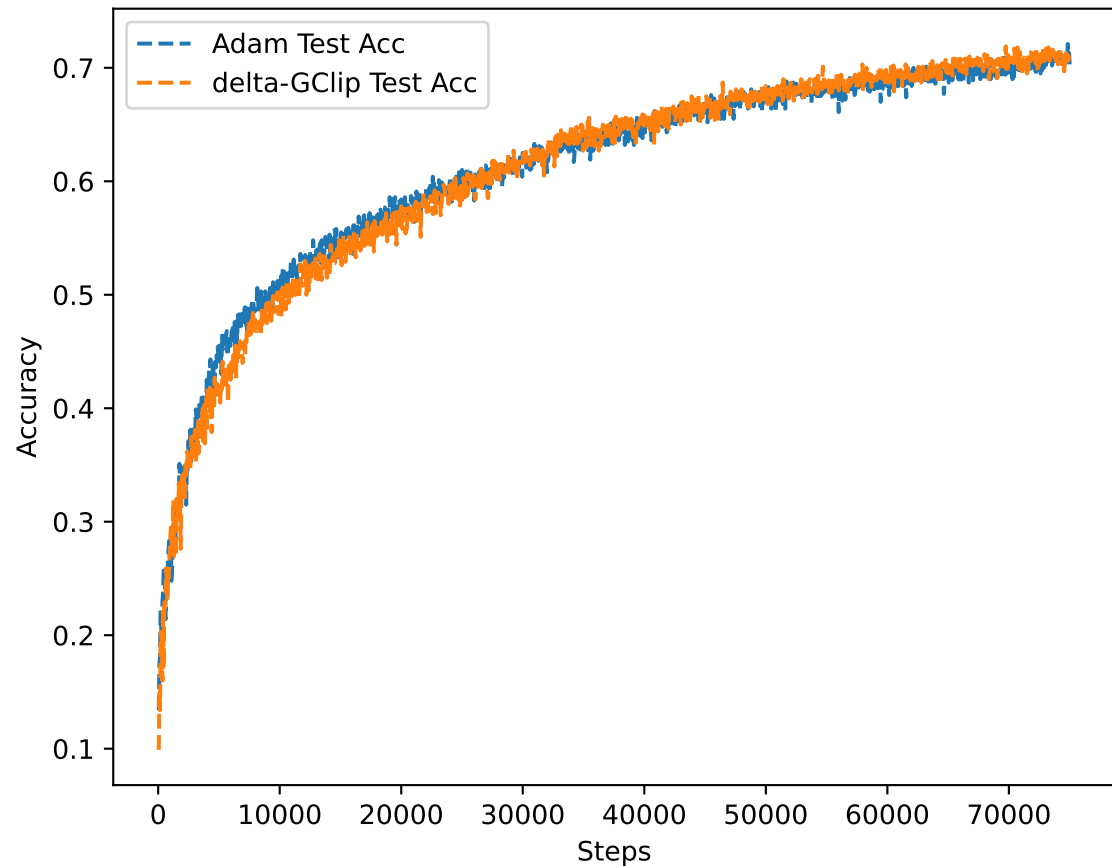

Supplement: supplementary_material [file attachment]

### Training and Testing Loss

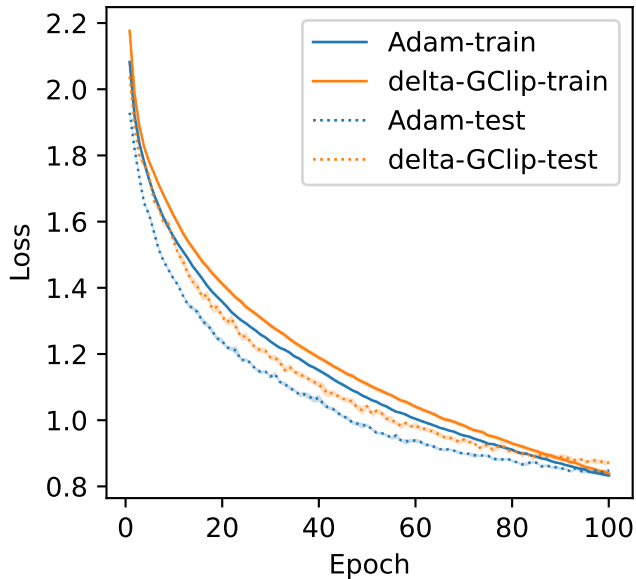

### Training and Testing Accuracy

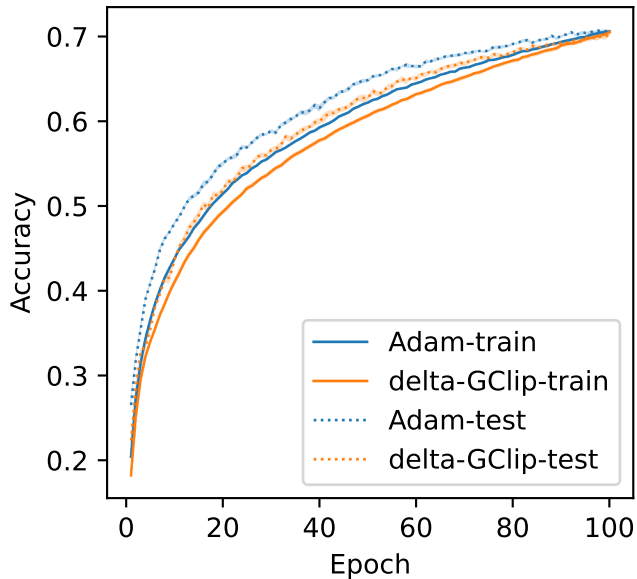

Supplement: supplementary_material [file attachment]

Test Loss (gamma=2.0)

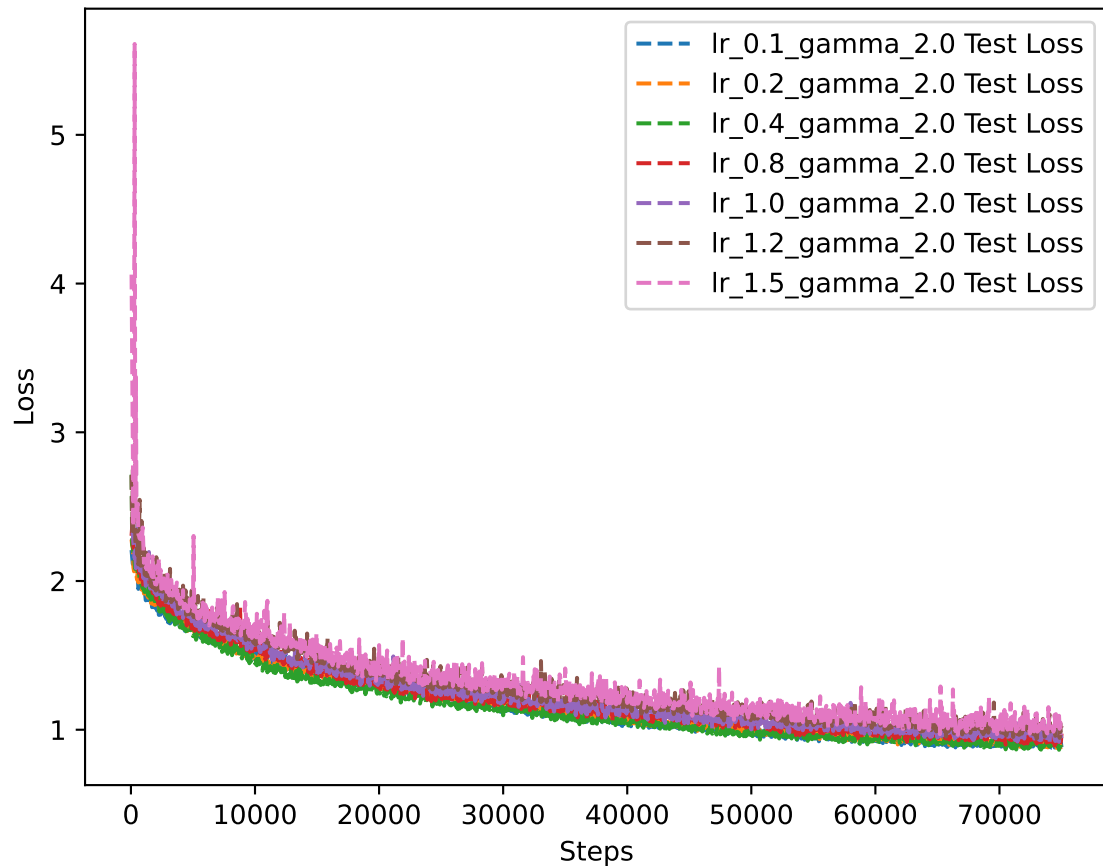

Test Accuracy (gamma=2.0)

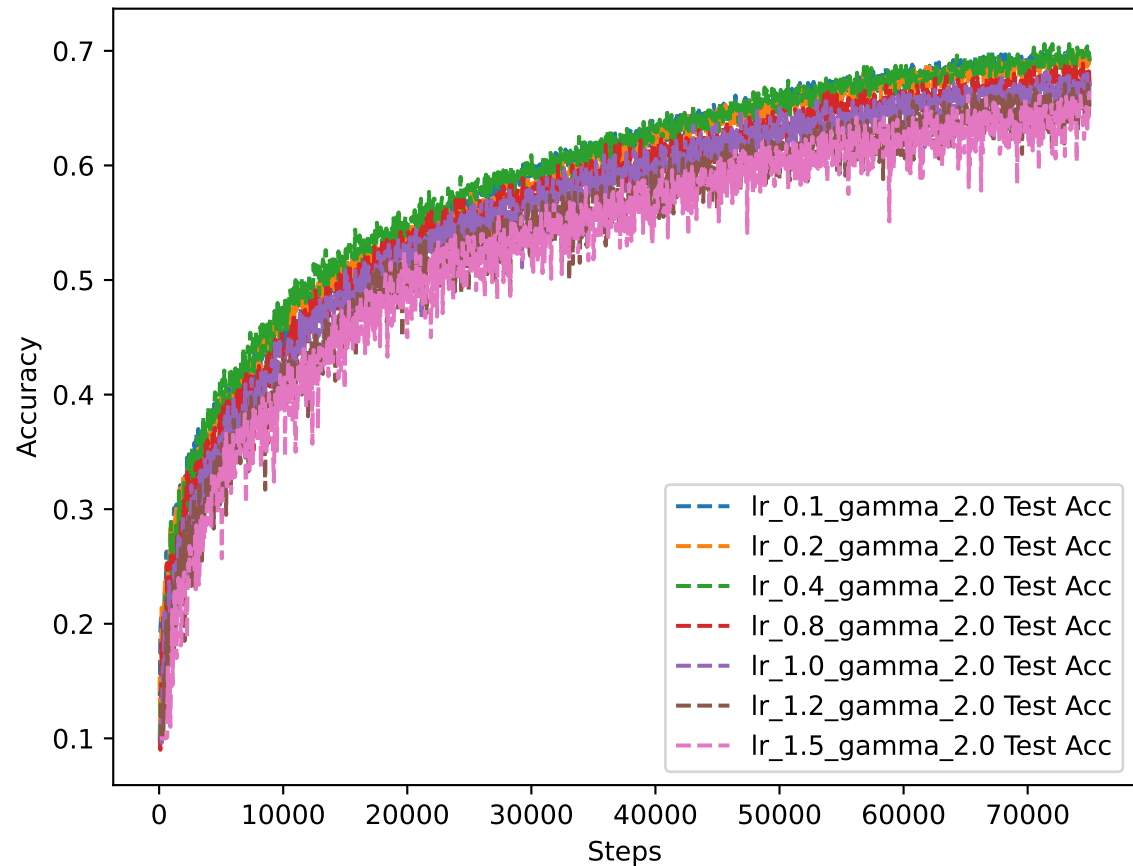

Supplement: supplementary_material [file attachment]

Train Loss

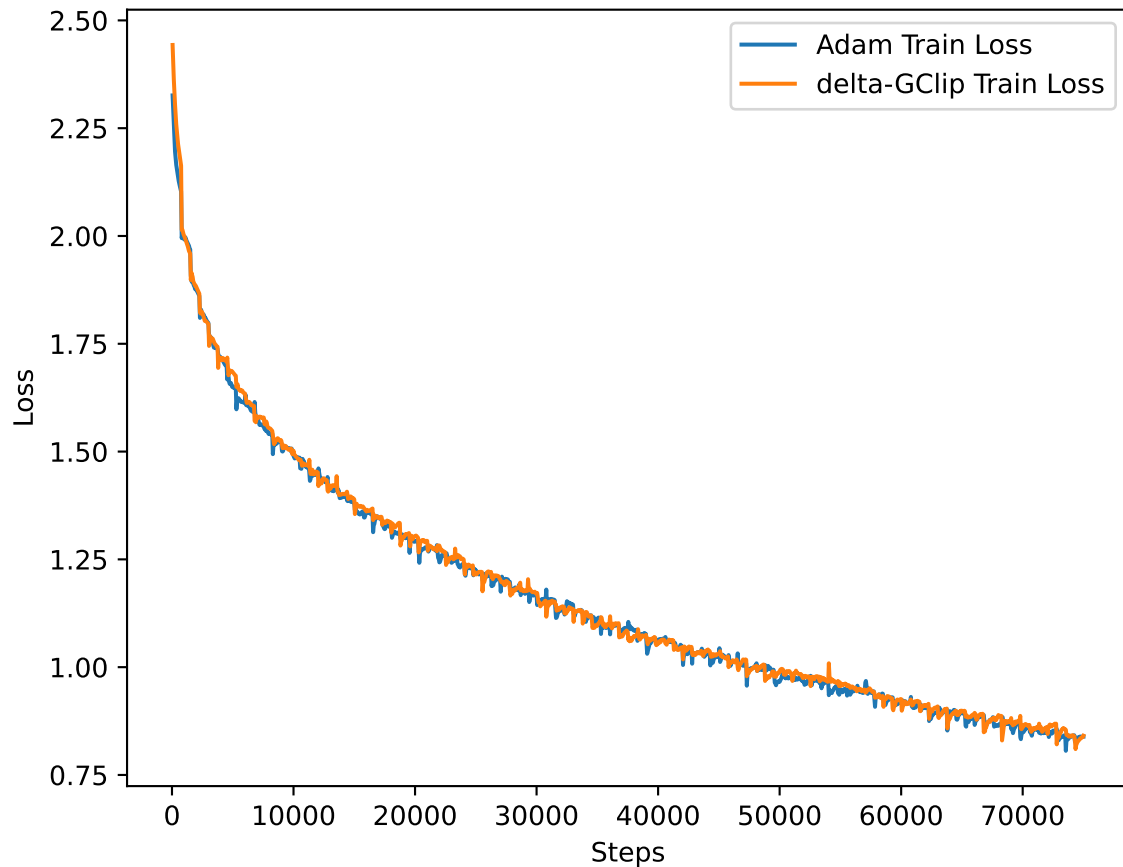

Train Accuracy

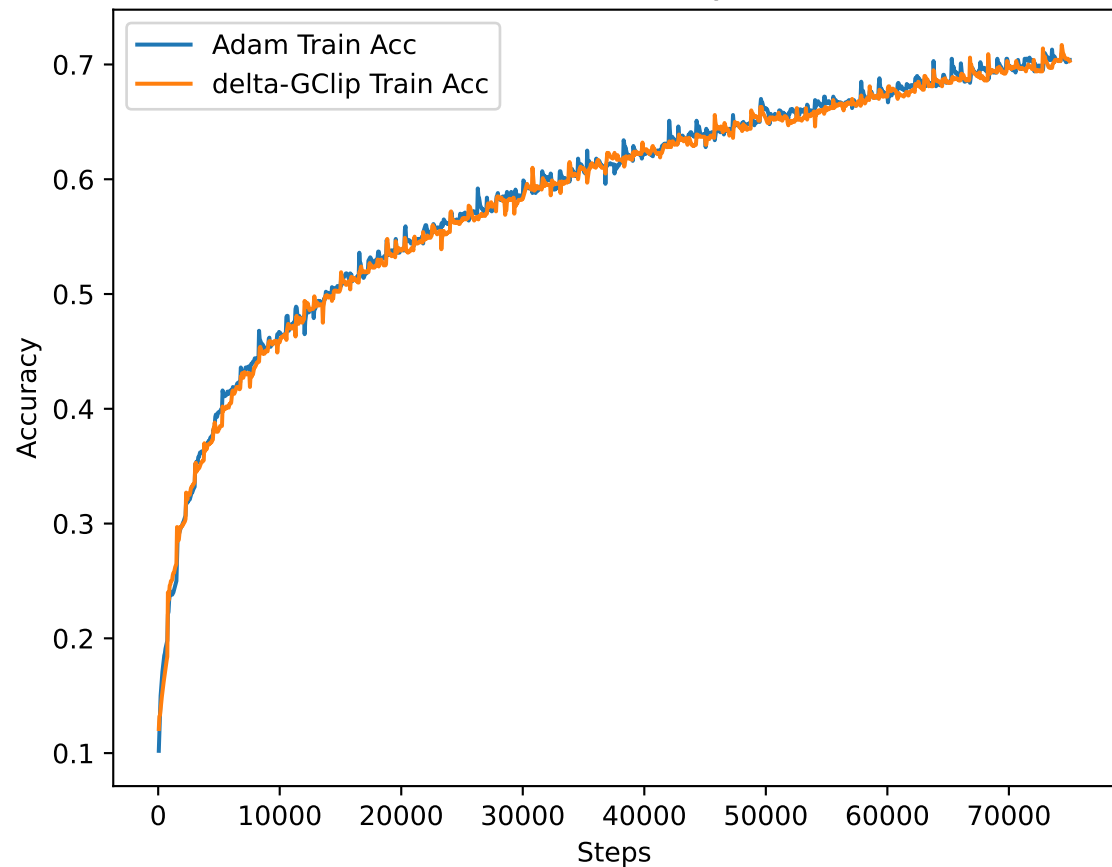

Supplement: supplementary_material [file attachment]

Loss (ViT Small)

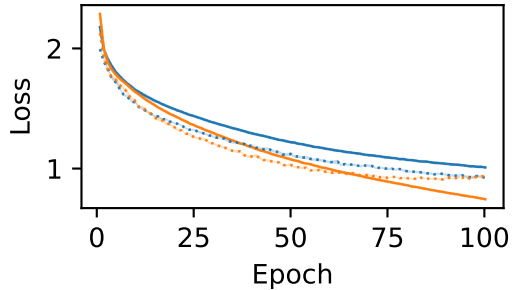

Accuracy (ViT Small)

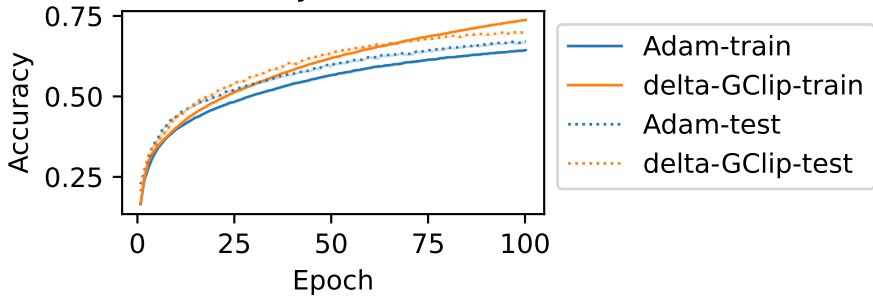

Supplement: supplementary_material [file attachment]

Train Loss (gamma=1.5)

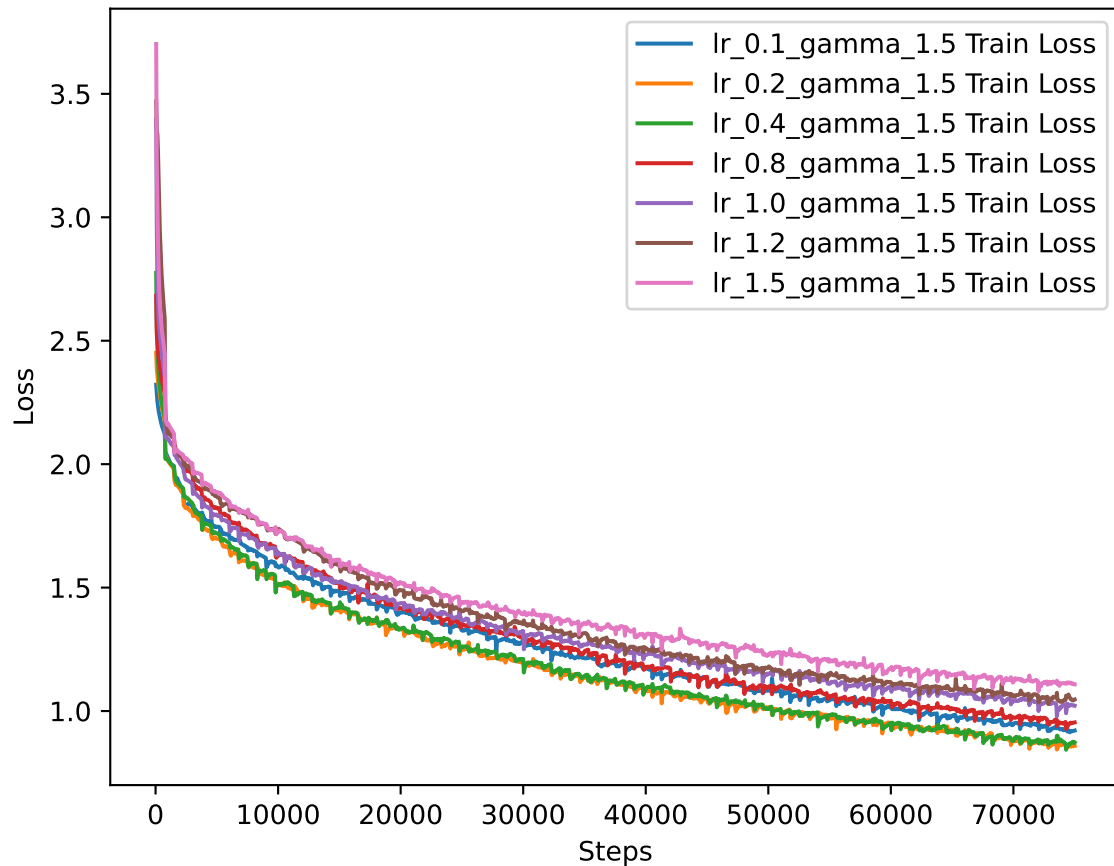

Train Accuracy (gamma=1.5)

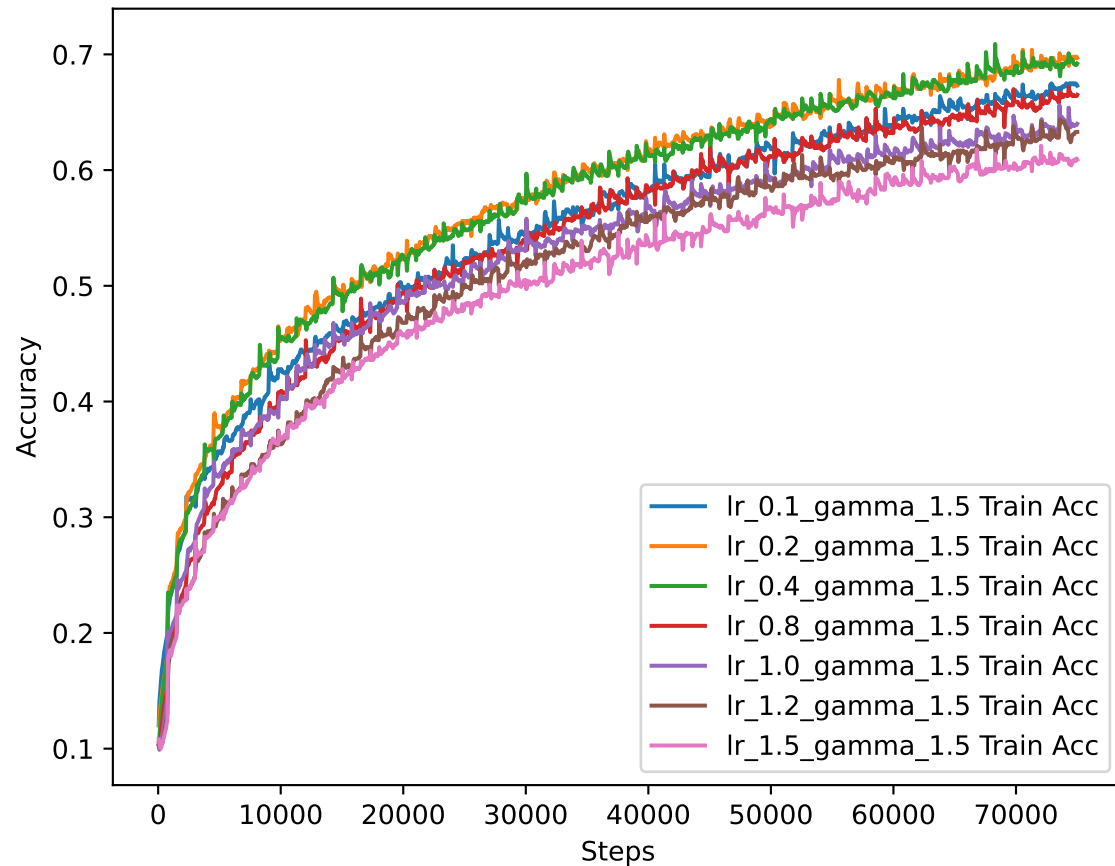

Supplement: supplementary_material [file attachment]

Train Loss (gamma=2.0)

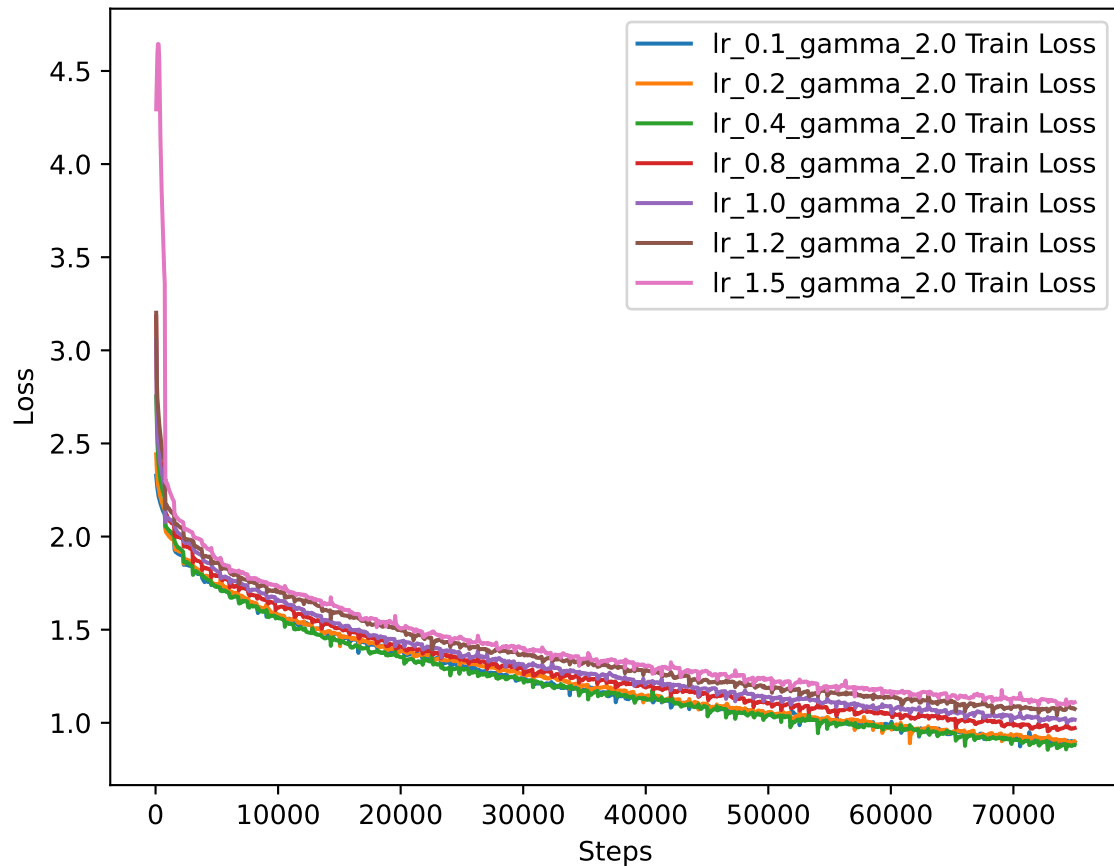

Train Accuracy (gamma=2.0)

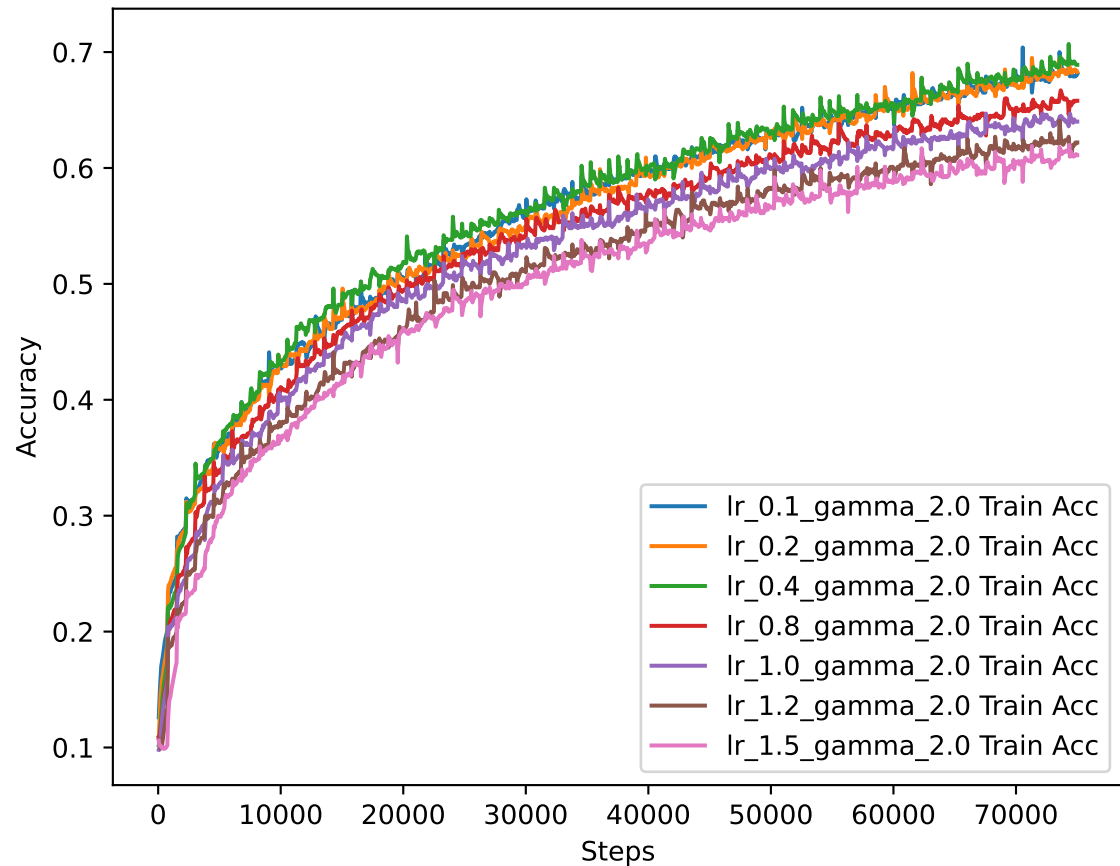

Supplement: supplementary_material [file attachment]

Train Loss (gamma=1.0)

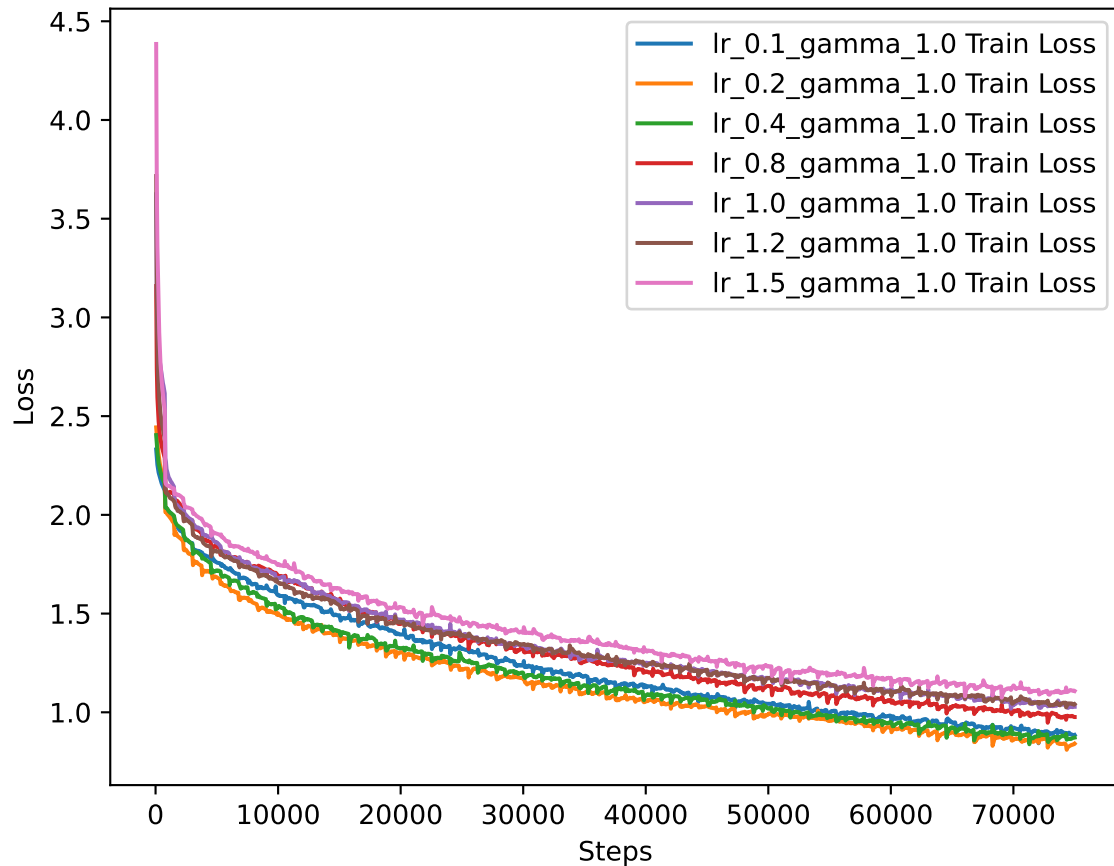

Train Accuracy (gamma=1.0)

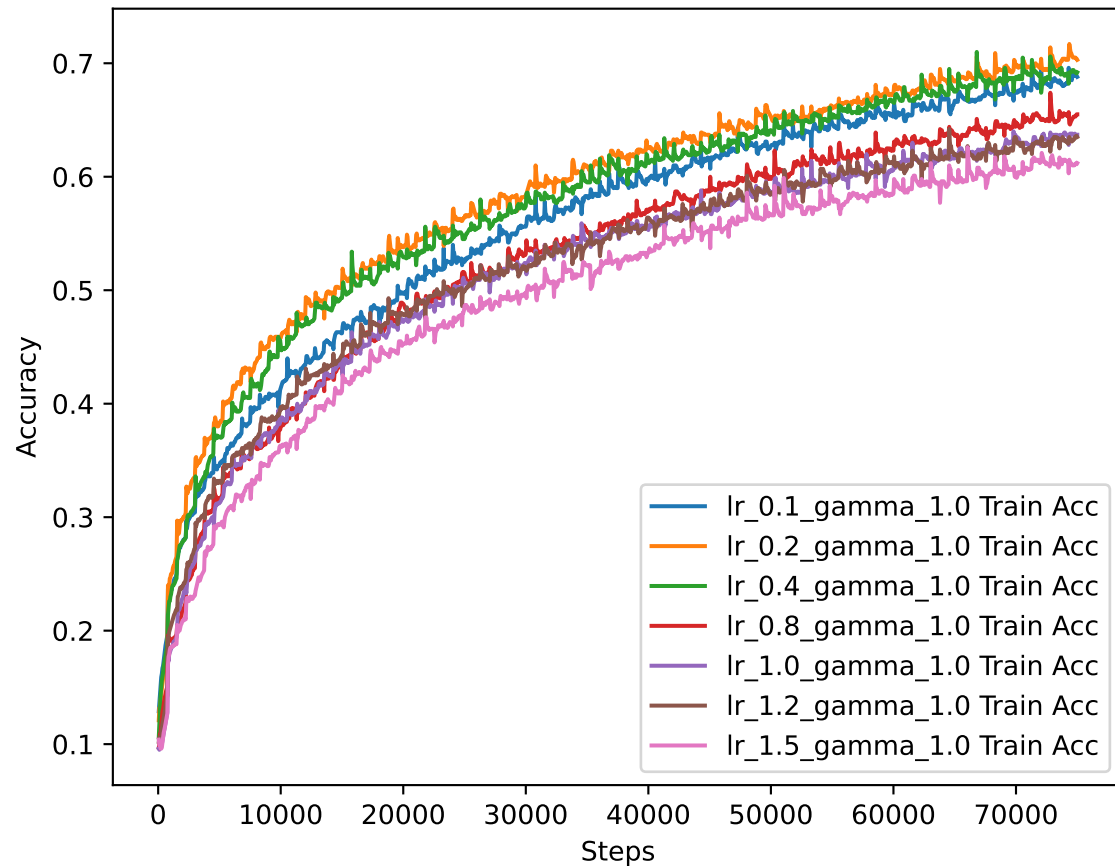

Supplement: supplementary_material [file attachment]

Test Loss (gamma=1.0)

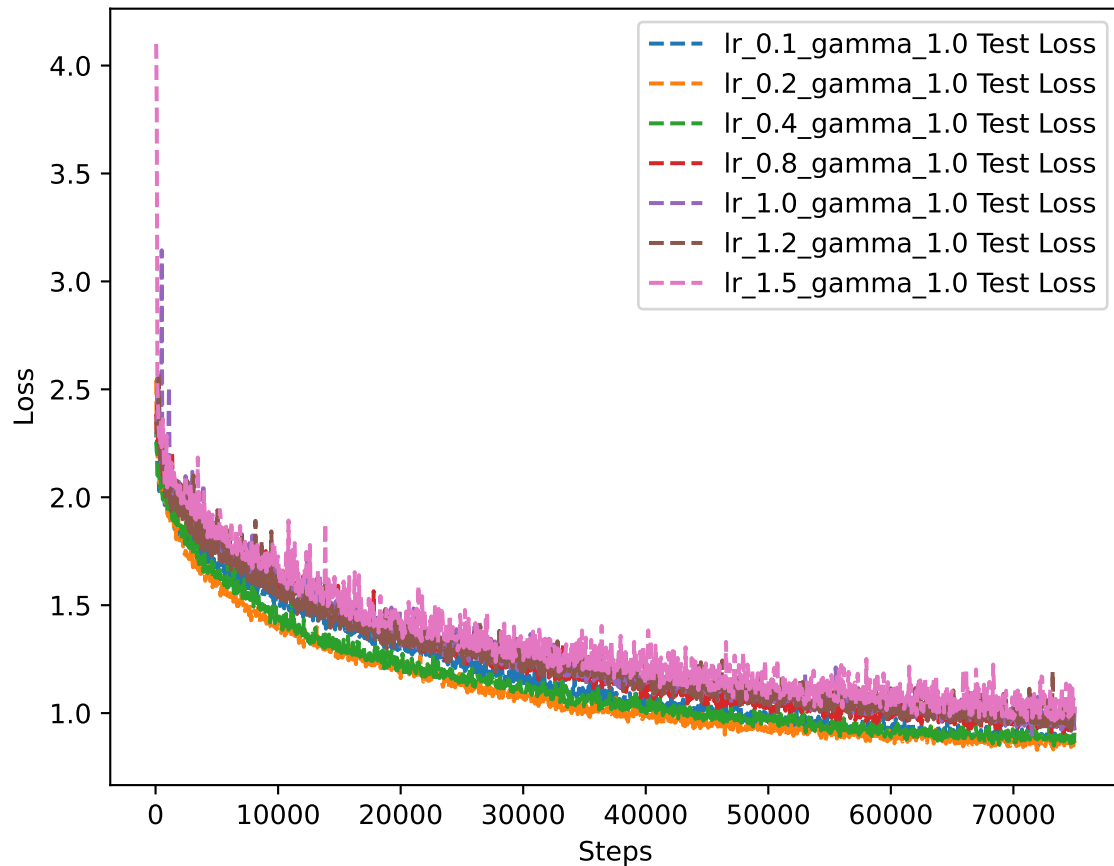

Test Accuracy (gamma=1.0)

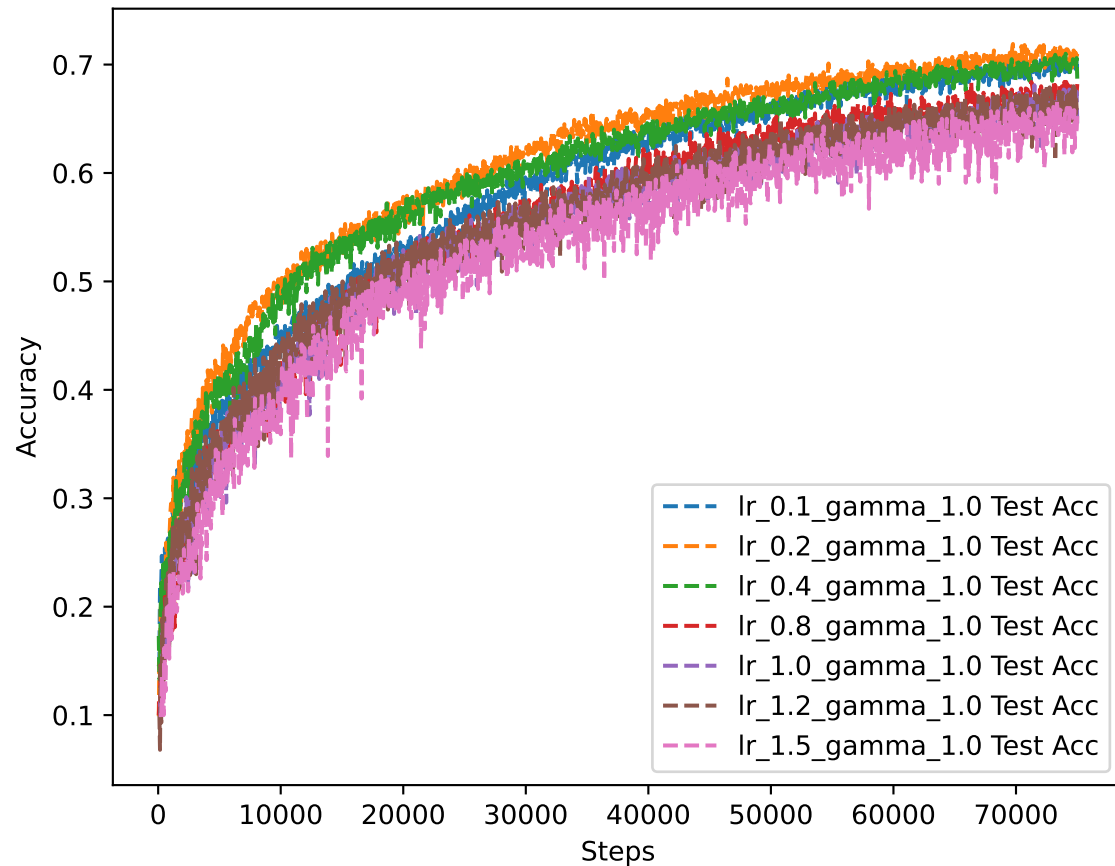

Supplement: supplementary_material [file attachment]

### Training and Test Loss

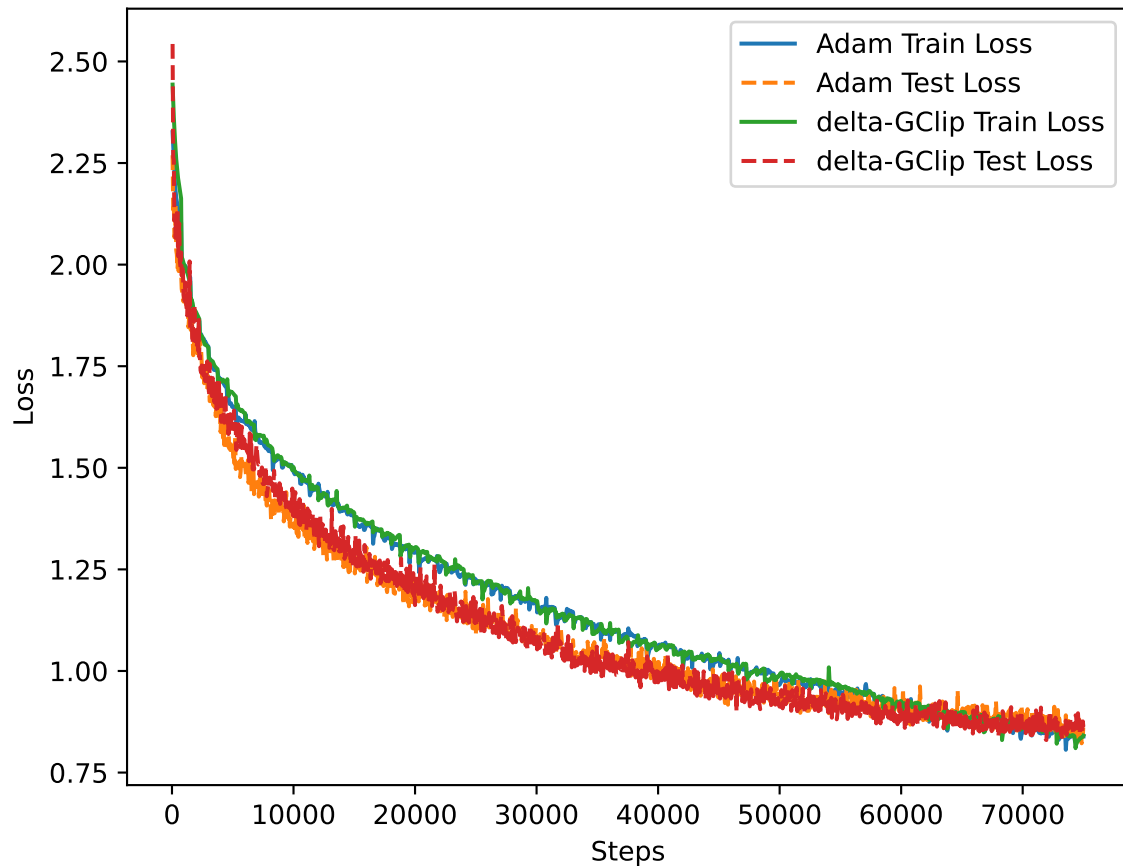

### Training and Test Accuracy

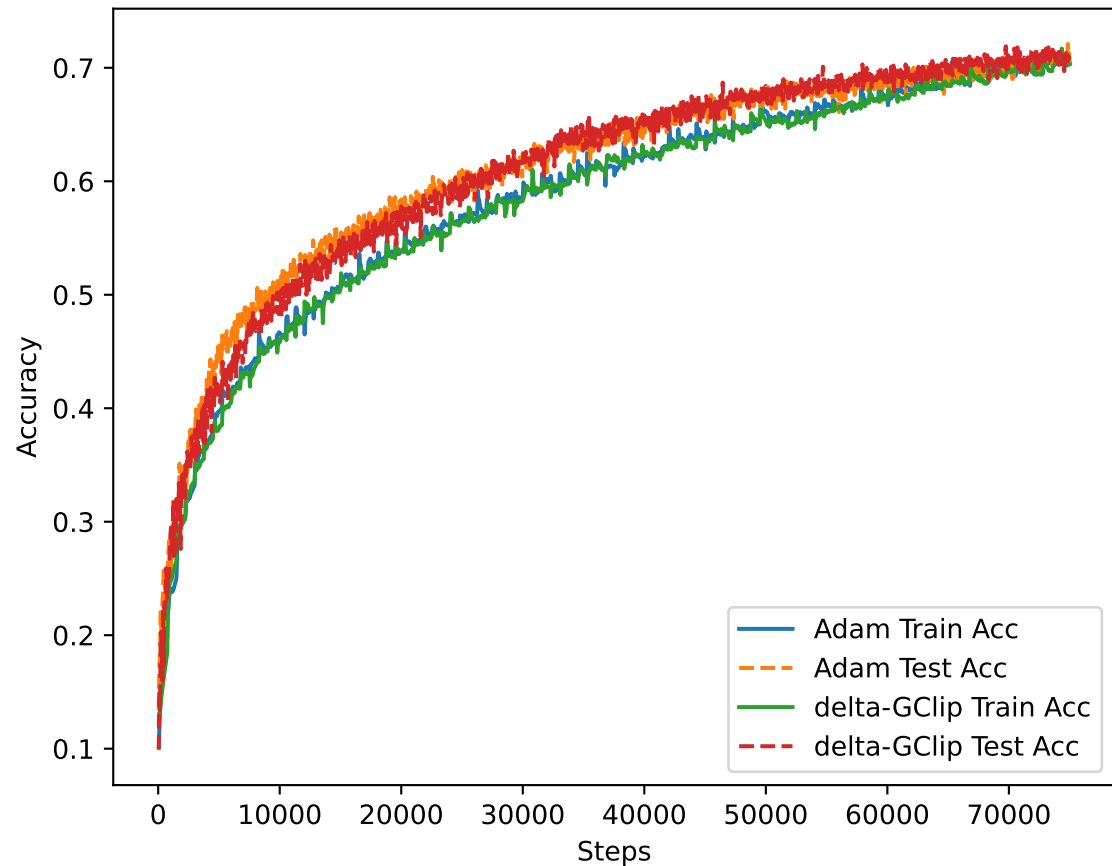

Supplement: supplementary_material [file attachment]

Train Loss (lr=0.4)

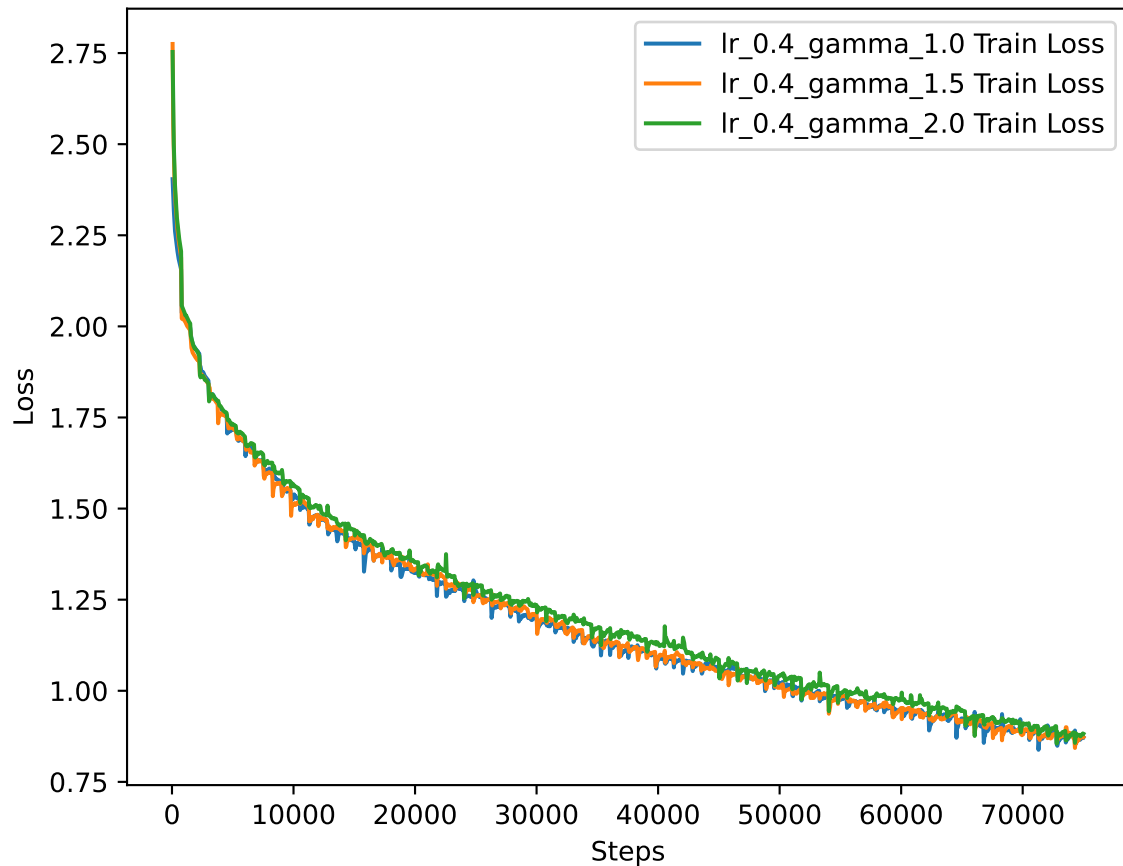

Train Accuracy (lr=0.4)

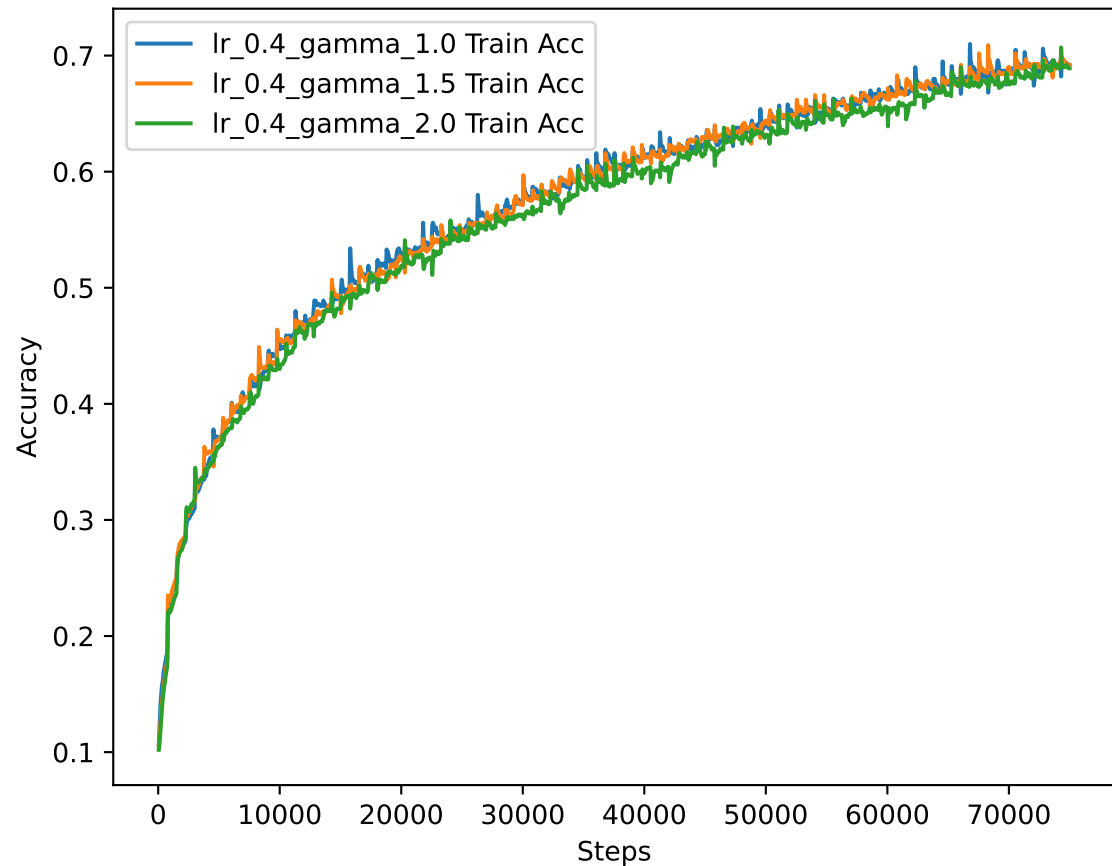

Supplement: supplementary_material [file attachment]

### Training and Testing Loss

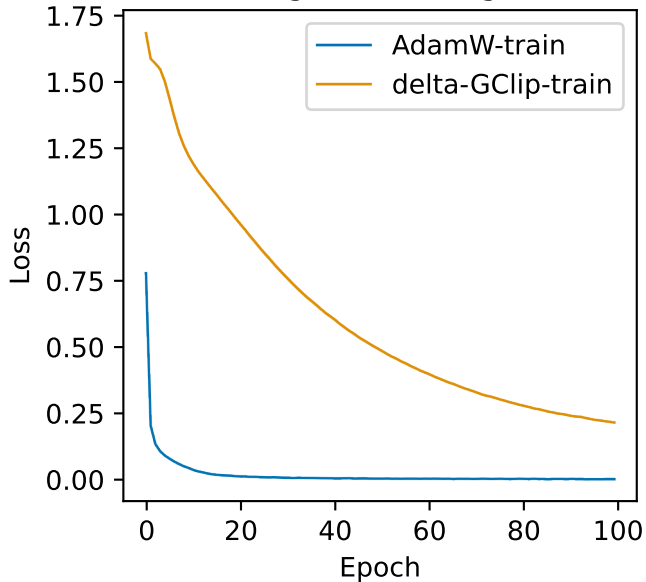

### Training and Testing Accuracy

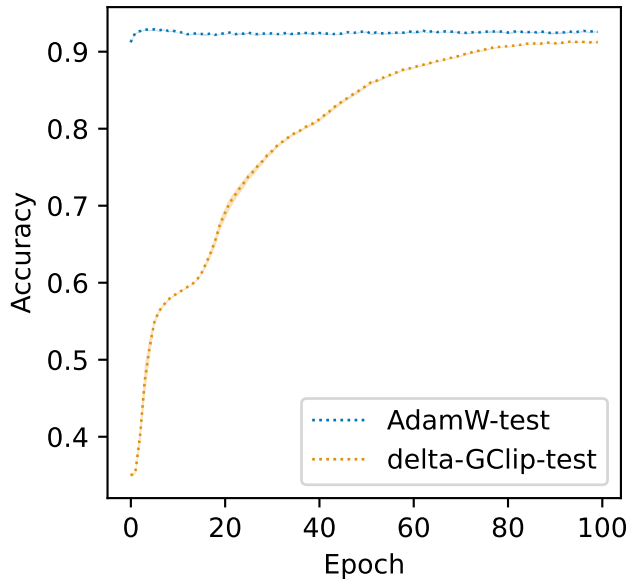

Supplement: supplementary_material [file attachment]

Train Loss (lr=0.2)

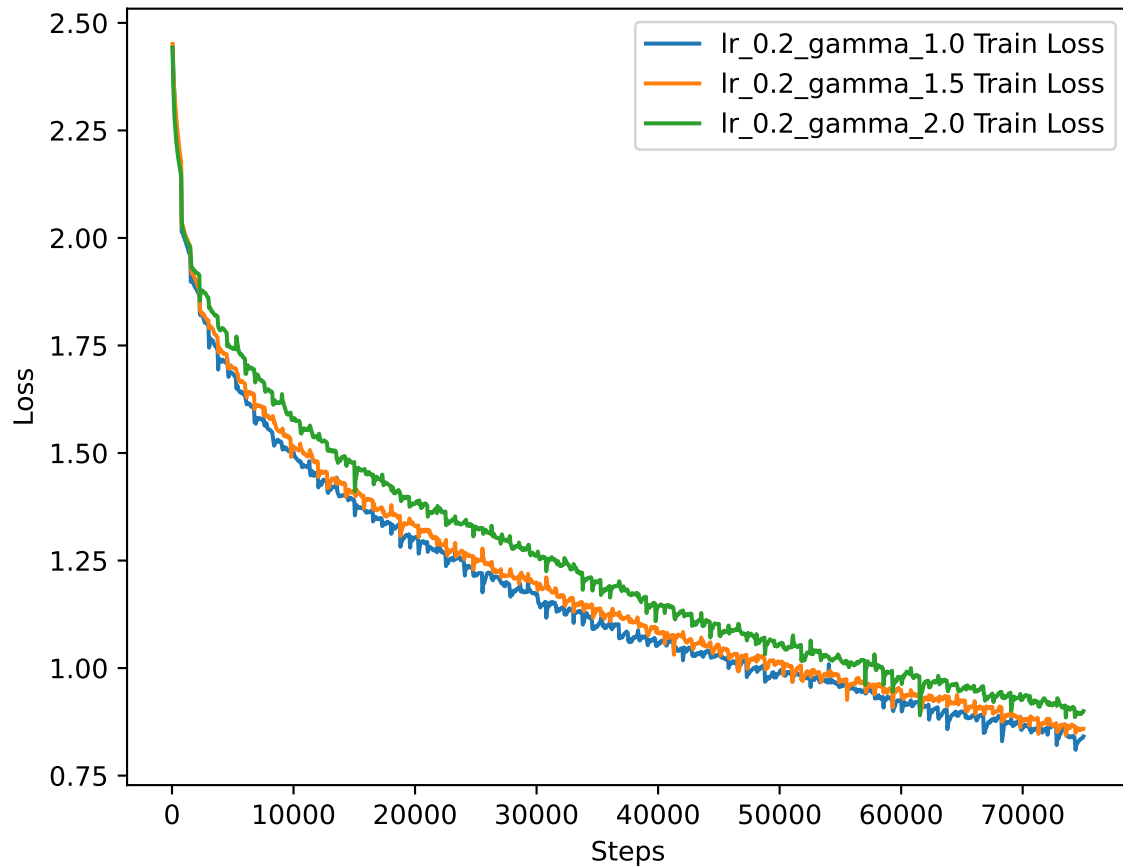

Train Accuracy (lr=0.2)

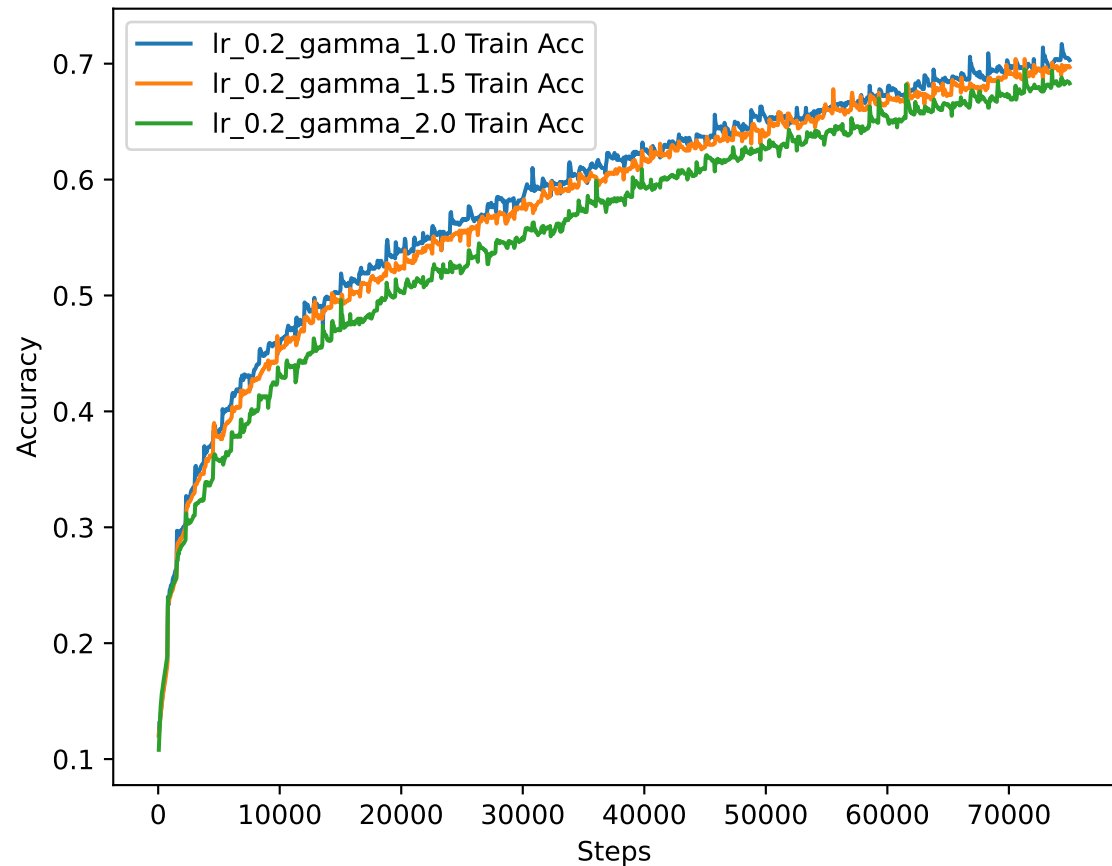

Supplement: supplementary_material [file attachment]

Loss (ViT Tiny)

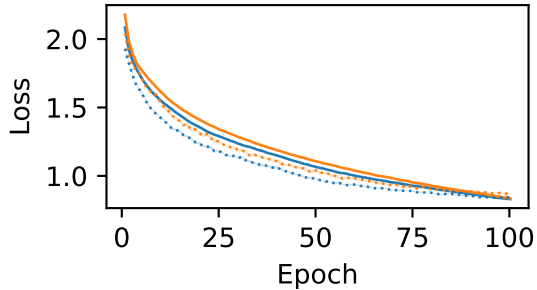

Accuracy (ViT Tiny)

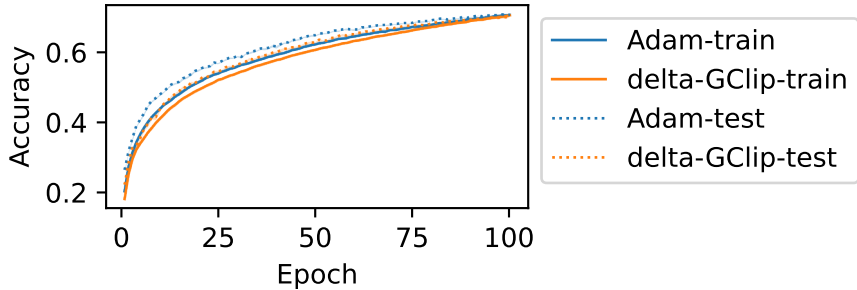

Supplement: supplementary_material [file attachment]
